# Supplementary material for: Thymic stromal lymphopoietin (TSLP) inhibits human colon tumor growth by promoting apoptosis of tumor cells
Source: PubMed Central journal article supplement (PMC4941354; doi:10.18632/oncotarget.7614), 2016-02-23
Supplement: oncotarget-07-16840-s001.pdf [file oncotarget-07-16840-s001.pdf]

## SUPPLEMENTARY FIGURES AND TABLES

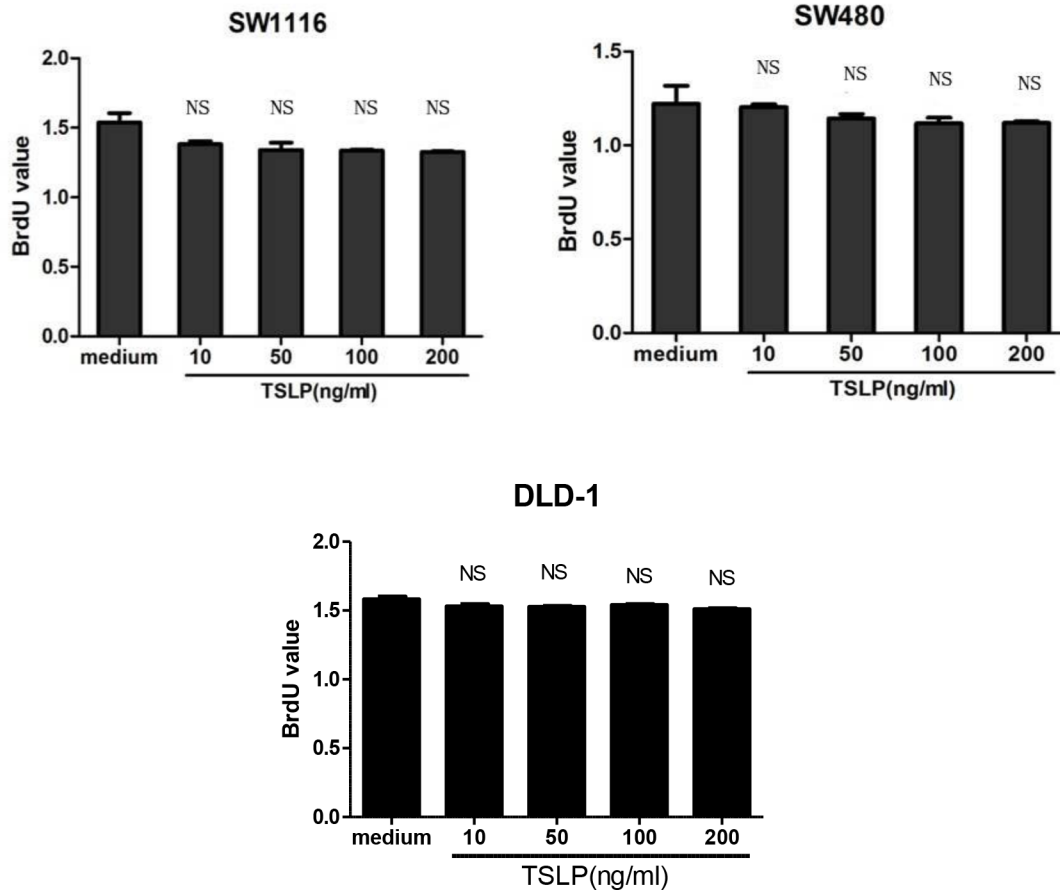

**Supplementary Figure S1: Exogenous TSLP treatment does not influence the proliferation of colon cancer cells.** Cells were stimulated with TSLP at indicated concentrations for 48 h followed by incubating with BrdU for 30 min, and the BrdU values were measured. Columns and error bars are representatives of mean $\pm$ SEM of triplicate in one experiment. Similar results were obtained in three independent experiments. NS=no significant.

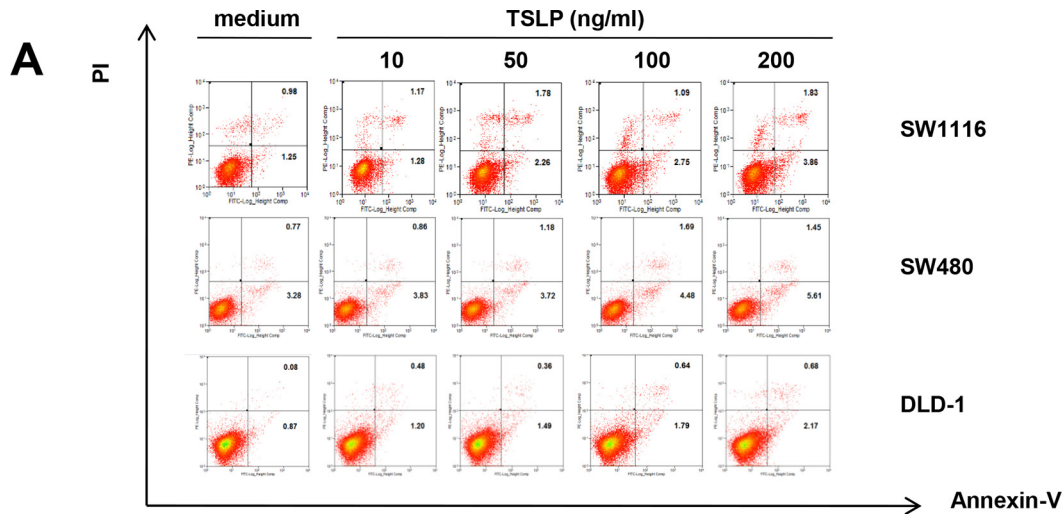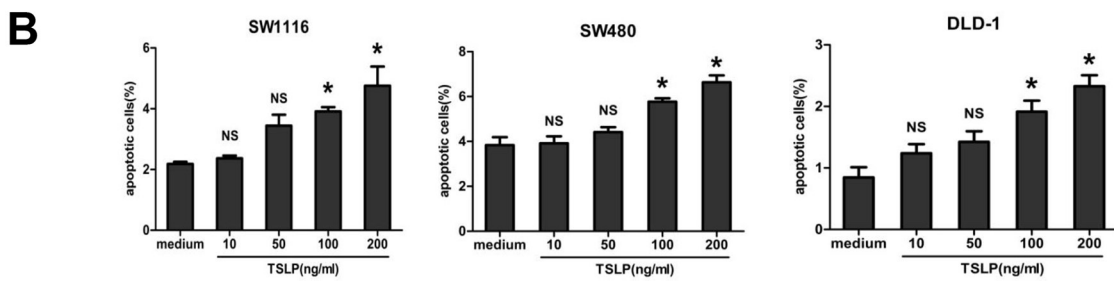

**Supplementary Figure S2: TSLP treatment for 24 h promotes apoptosis of colon cancer cells at higher concentrations.**

**A.** Representative data of flow cytometric analysis of Annexin V-FITC/PI double-staining apoptotic cells in three colon cancer cell lines treated with TSLP at indicated concentrations for 24 h. **B.** The percentages of apoptotic cells in TSLP-treated colon cancer cells. Columns and error bars are representatives of mean±SEM of triplicate in one experiment. Similar results were obtained in three independent experiments. NS=no significant ; \*P<0.05 versus medium group.

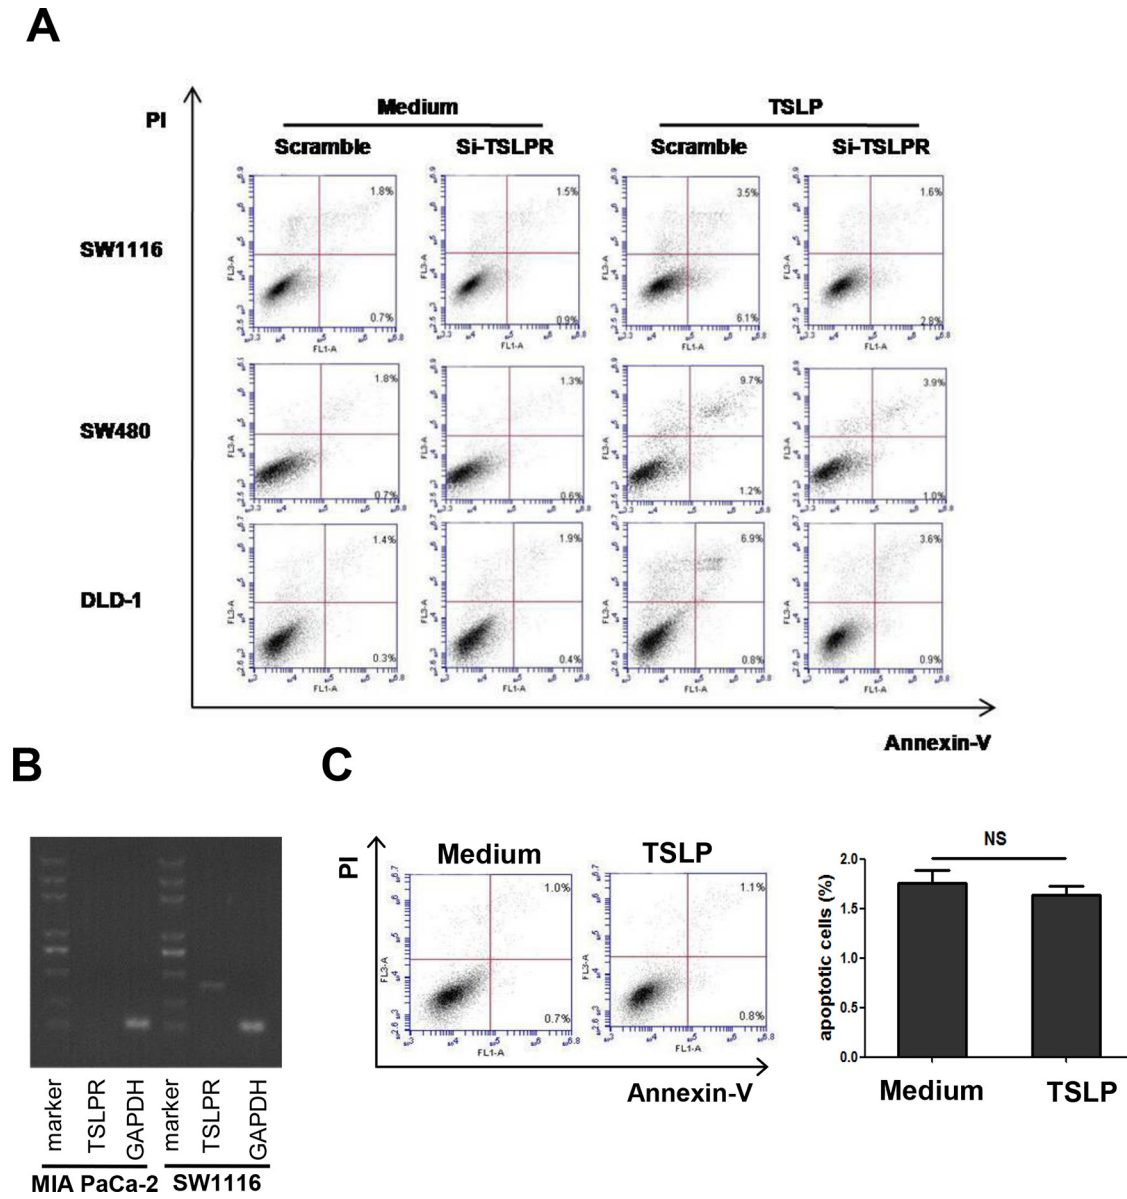

**Supplementary Figure S3: The apoptosis-promoting activity of exogenous TSLP is mediated by TSLPR signaling.** A. Representative data of flow cytometric analysis of Annexin V-FITC/PI double-staining apoptotic cells in three colon cancer cell lines in which TSLPR was down-regulated by siRNA at 48 h after TSLP treatment (100 ng/ml). B. TSLPR mRNA expression was undetectable in MIA-Paca2. C. Representative data of flow cytometric analysis of Annexin V-FITC/PI double-staining apoptotic cells and the average percentages of apoptotic cells in TSLP-treated MIA-Paca2. NS=no significant.

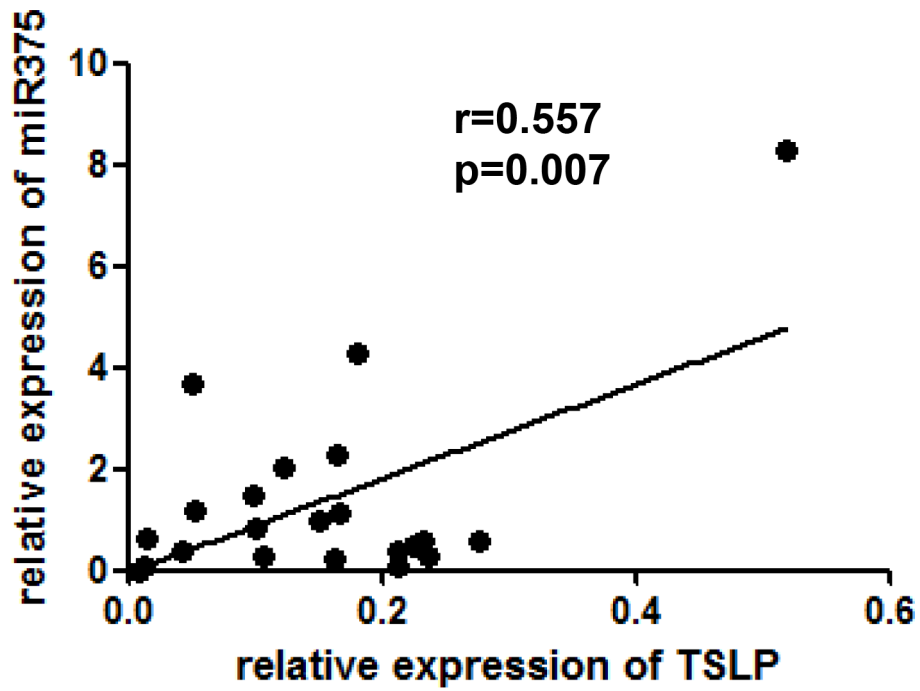

**Supplementary Figure S4: TSLP positively correlates with miR-375 expression in human colon tumor tissues.** Gene expression of TSLP and miR-375 was examined by qRT-PCR analysis. The correlation between TSLP and miR-375 gene expression was analyzed by Pearson correlation coefficient.

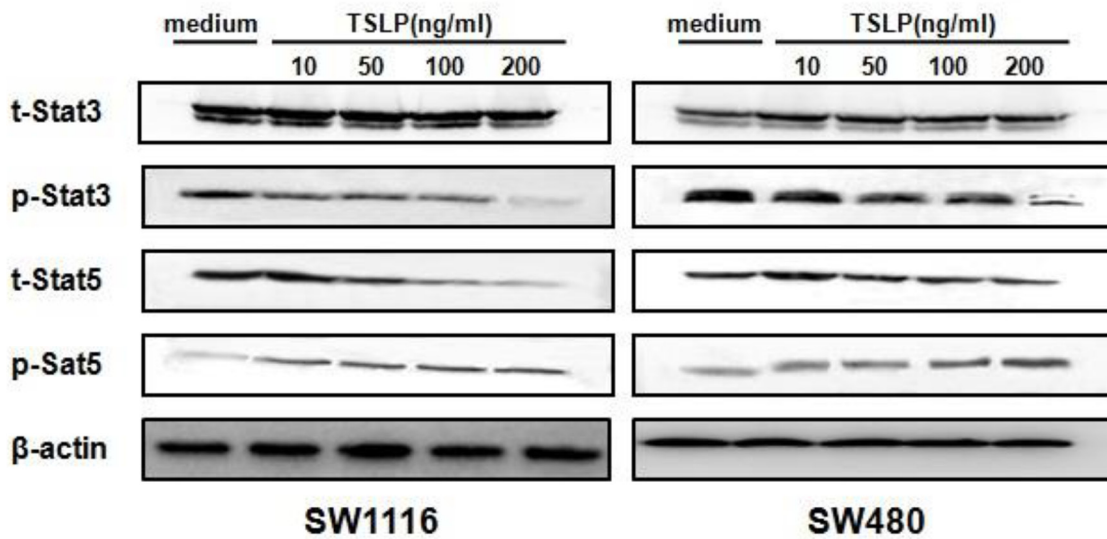

**Supplementary Figure S5: TSLP treatment causes up-regulation of phosphorylated STAT5 but down-regulation of phosphorylated STAT3 levels in colon cancer cells.** Western blotting analysis of protein levels of total and phosphorylated STATs (STAT3 and STAT5) in TSLP-treated colon cancer cells (SW1116 and SW480) at indicated concentrations for 48 h.  $\beta$ -actin was used as the control.

Supplementary Table S1: clinic characteristics of colon cancer patients

|                      | Duke's A<br>(n=6) | Duke's B<br>(n=16) | Duke's C<br>(n=12) | Duke's D<br>(n=6) |
|----------------------|-------------------|--------------------|--------------------|-------------------|
| male                 | 4                 | 10                 | 8                  | 5                 |
| age                  | 63.5              | 63.3               | 62.4               | 62.1              |
| tumor diameter(>5cm) | 1                 | 9                  | 6                  | 1                 |
| tumor site           |                   |                    |                    |                   |
| ileocecus            | 1                 | 3                  | 1                  | 1                 |
| ascending colon      | 1                 | 2                  | 1                  | 2                 |
| transverse colon     | 0                 | 1                  | 0                  | 0                 |
| sigmoid colon        | 0                 | 6                  | 1                  | 3                 |
| rectum               | 4                 | 4                  | 9                  | 0                 |
| operation            |                   |                    |                    |                   |
| partial resection    | 2                 | 12                 | 6                  | 6                 |
| miles                | 2                 | 1                  | 4                  | 0                 |
| Dixon                | 2                 | 2                  | 1                  | 0                 |
| Hartmann             | 0                 | 1                  | 1                  | 0                 |

**Supplementary Table S2: Primer sequences**

---

|       |         |                               |
|-------|---------|-------------------------------|
| TSLP  | forward | 5'-TATGAGTGGGACCAAAAGTACCG-3' |
|       | reverse | 5'-GGGATTGAAGGTTAGGCTCTGG-3'  |
| TSLPR | forward | 5'-GAGTGGCAGTCCAAACAGGAA-3'   |
|       | reverse | 5'-ACATCCTCCATAGCCTTCACC-3'   |
| IL-7R | forward | 5'-TGGACGCATGTGAATTTATC-3'    |
|       | reverse | 5'-CATTCACTCCAGAAGCCTTT-3'    |
| GAPDH | forward | 5'-CAAAAGGGTCATCATCTCTG-3'    |
|       | reverse | 5'-CCTGCTTCACCACCTTCTTG-3'    |

---
